# Supplementary material for: Thermogravimetry-Infrared Spectroscopy Analysis of the Pyrolysis of Willow Leaves, Stems, and Branches
Source: Hindawi journal article supplement (doi:10.1155/2015/303212), 2015-01-01
Supplement: f1 [file 303212.f1.doc]

**Supplementary Materials：**

**Figure S1 The Zero-discharge wastewater system**


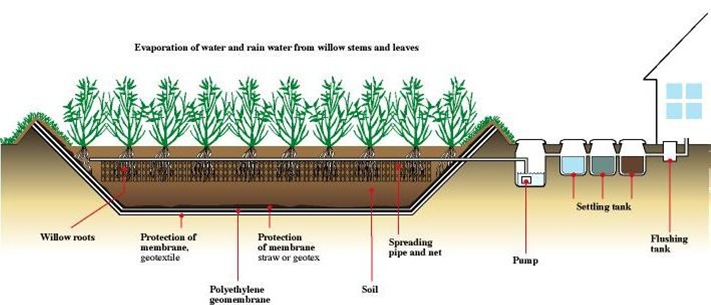


The Zero-discharge wastewater system is simple to operate, has very low operational costs and is very reliable facilities to purify waste water.

All wastewater from households (black and grey) is recirculated in the willow bed. The first step is to settle fat and particles in a settling tank. After settling, the wastewater runs by gravitation to a pump well with a small electrical pump. A pump for a normal household will consume around 30 kWh a year, depending of distance from pump well to facility. Normally only a small pipe is enough for the transport of wastewater to the spreading system.

After that is just to plant willow cutting seedlings. This has to be done in early spring and the wastewater has to be added right after planting. In this way the willow trees will grow up and empty the soil during spring summer and autumn, so that will be sufficient room in soil for wastewater and rain falling directly in the facility during the winter. Willow clones used for willow wastewater cleaning facilities are the newest and most quick- growing clones of *Salix Viminalis*.

Nutrients and heavy metals are effectively uptaken in the willow stems and approx. 10- 20 tones of dry matter per hectare are produced. The willow-biomass can be used as building materials, woodchips and wood vinegar.
